# Supplementary material
Source: PubMed Central journal article supplement (PMC4031934)
Supplement: supp_M039925_jlr.M039925-2.pdf [file supp_M039925_jlr.M039925-2.pdf]

**Supplemental data:** Table 1.

| Sr. no. | Compound Name     | Fit values |
|---------|-------------------|------------|
| 1       | Epigallocatechin  | 2.99523    |
| 2       | Oleuopin          | 2.98987    |
| 3       | Isoquercitrin     | 2.9873     |
| 4       | Vitexin           | 2.97756    |
| 5       | Baicalin          | 2.94166    |
| 6       | Quercetin         | 2.86786    |
| 7       | Decohexonoic acid | 2.86786    |
| 8       | Isorhamntein      | 2.85989    |
| 9       | Curcumin          | 2.82555    |
| 10      | Catechin          | 2.77165    |
| 11      | Shikonin          | 2.82064    |
| 12      | Cordycepin        | 2.72491    |
| 13      | Geneistein        | 2.14148    |
| 14      | Capciacin         | 2.44208    |
| 15      | Rhein             | 2.35748    |
| 16      | Lipoic acid       | 1.99988    |
| 17      | Biacalian         | 2.04177    |
| 18      | Nobeletin         | 1.99345    |
| 19      | Formonotein       | 1.99235    |
| 20      | Berberine         | 1.94214    |
