# Supplementary material
Source: PubMed Central journal article supplement (PMC4031934)

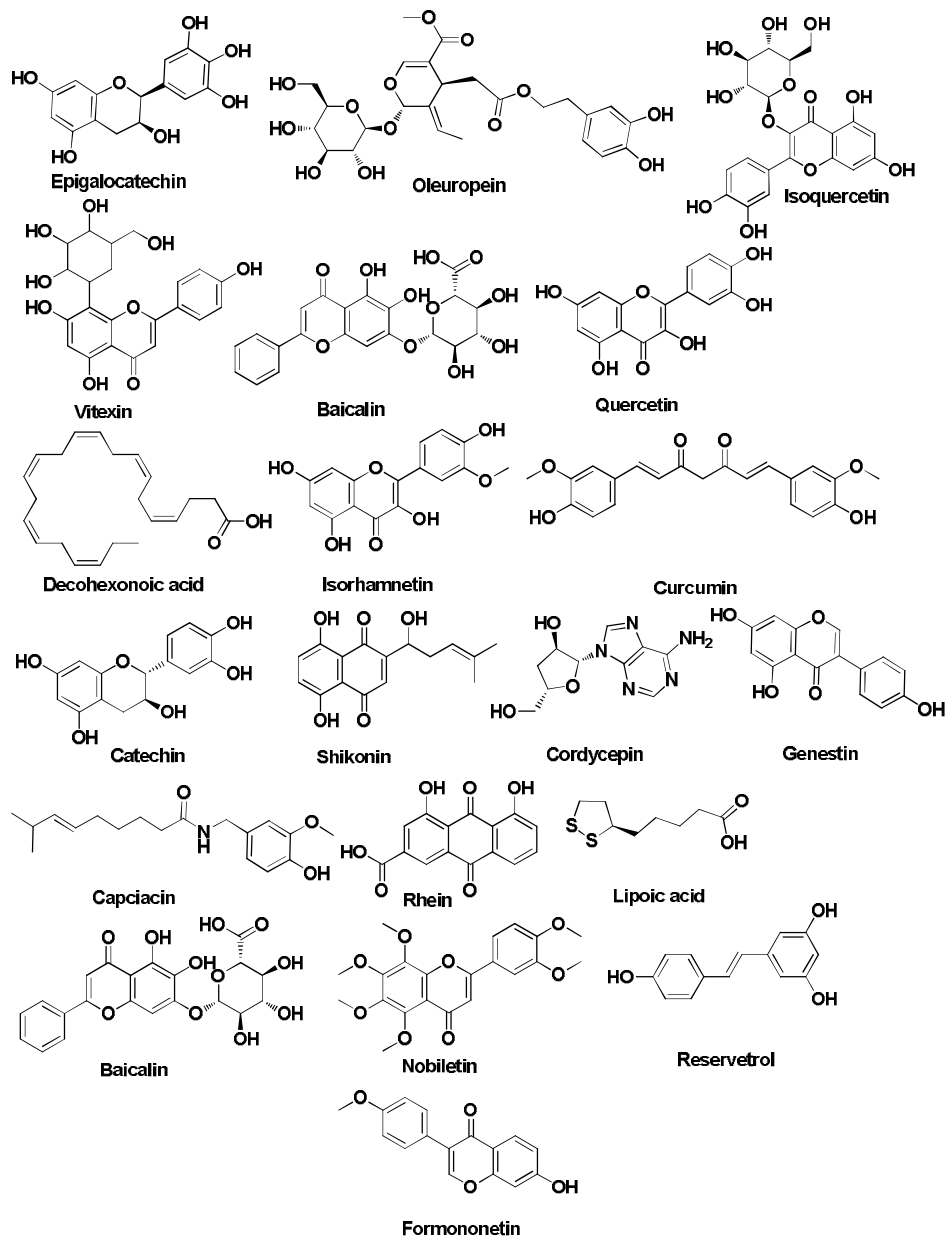

Supplemental Data Figure I

Supplement: supp_M039925_jlr.M039925-3.pdf [file supp_M039925_jlr.M039925-3.pdf]

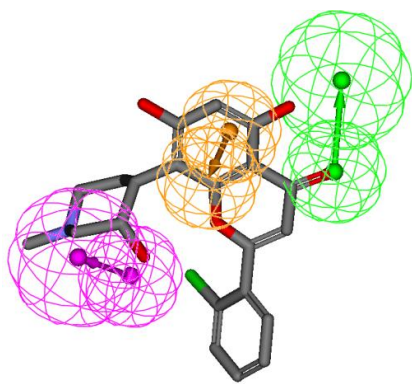

**Flavopiridol**

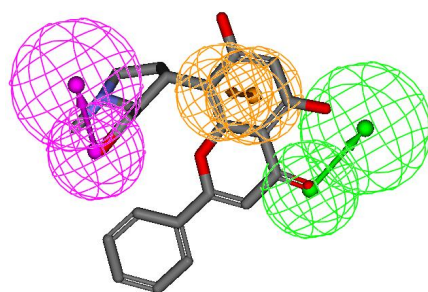

**P-00-267**

**Supplemental Data Figure II**

Supplement: supp_M039925_jlr.M039925-4.pdf [file supp_M039925_jlr.M039925-4.pdf]

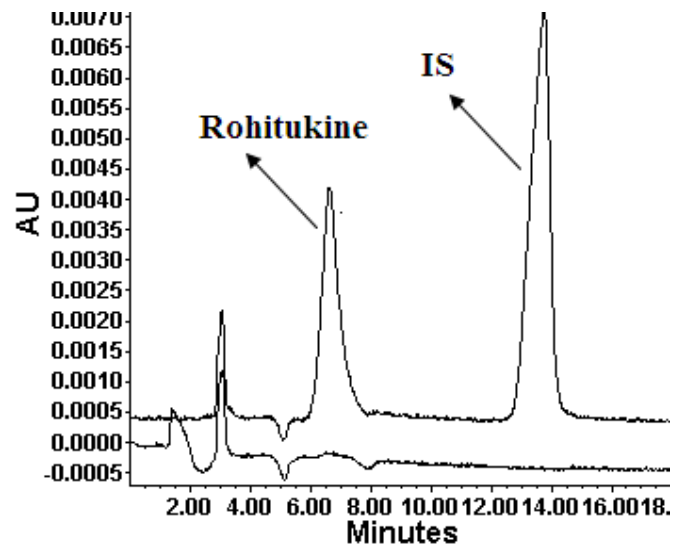

Supplemental Data Figure III

Supplement: supp_M039925_jlr.M039925-5.pdf [file supp_M039925_jlr.M039925-5.pdf]

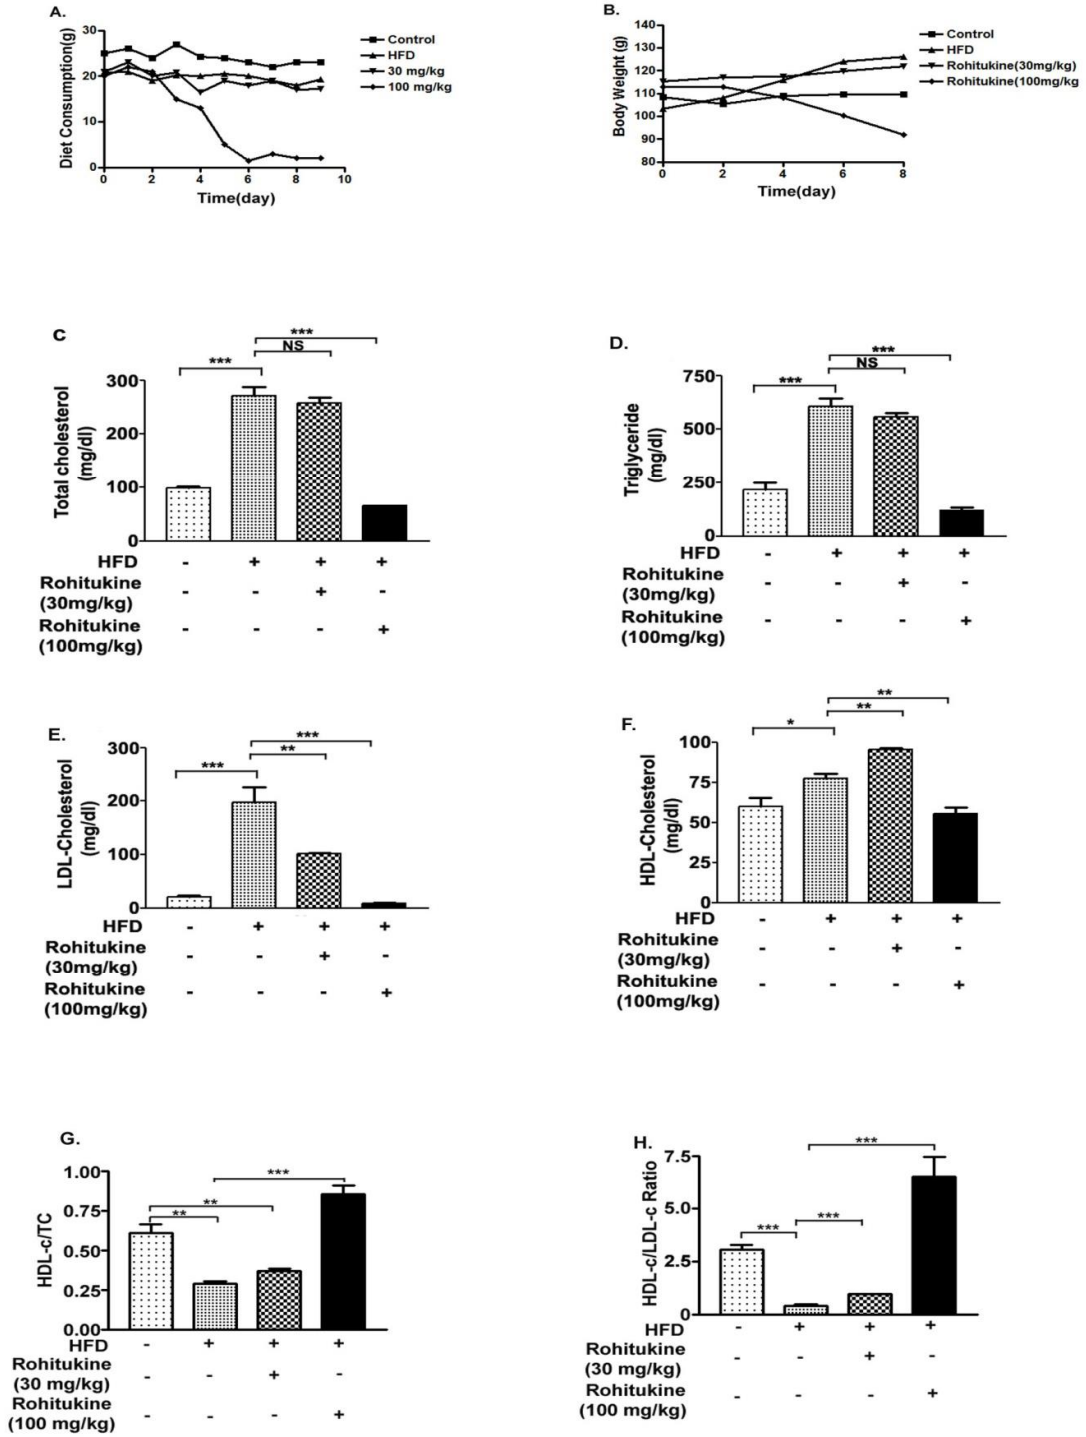

Supplemental Data Figure IV

Supplement: supp_M039925_jlr.M039925-6.pdf [file supp_M039925_jlr.M039925-6.pdf]
